# Supplementary material
Source: ML conference proceedings conference paper supplement (https://openaccess.thecvf.com/content/WACV2022/html/Peeples_Learnable_Adaptive_Cosine_WACV_2022_paper.html)
Supplement: Supplementary file 1 [file Peeples_Learnable_Adaptive_Cosine_WACV_2022_supplemental.pdf]

# Learnable Adaptive Cosine Estimator (LACE) for Image Classification- Supplementary

Joshua Peeples   Connor H. McCurley   Sarah Walker   Dylan Stewart   Alina Zare  
Department of Electrical & Computer Engineering, University of Florida  
{jpeeples, cmccurley, sarah.walker, d.stewart, azare}@ufl.edu

## Appendix

We provide the derivations for the derivatives of the parameters for LACE as discussed in Section 3.1. The derivatives for the target signatures is shown in Section A and the background statistics (*i.e.*, mean and covariance) are shown in Sections B and C.

### A. Target Signatures

$$L_{LACE} = \frac{1}{B} \sum_{n=1}^B -\log \left( \frac{\exp \hat{\mathbf{s}}_c^T \hat{\mathbf{x}}_n}{\sum_{j=1}^C \exp \hat{\mathbf{s}}_j^T \hat{\mathbf{x}}_n} \right) \quad (1)$$

$$L_{LACE} = \frac{-1}{B} \sum_{n=1}^B \left( \hat{\mathbf{s}}_c^T \hat{\mathbf{x}}_n - \log \left( \sum_{j=1}^C \exp \hat{\mathbf{s}}_j^T \hat{\mathbf{x}}_n \right) \right) \quad (2)$$

$$L_{LACE} = \frac{-1}{B} \sum_{n=1}^B \left( \hat{\mathbf{x}}_n^T \hat{\mathbf{s}}_c - \log \left( \sum_{j=1}^C \exp \hat{\mathbf{x}}_n^T \hat{\mathbf{s}}_j \right) \right) \quad (3)$$

$$L_{LACE} = \frac{-1}{B} \sum_{n=1}^B \left( \hat{\mathbf{x}}_n^T \left( \frac{\mathbf{D}^{-\frac{1}{2}} \mathbf{U}^T \mathbf{s}_c}{\|\mathbf{D}^{-\frac{1}{2}} \mathbf{U}^T \mathbf{s}_c\|} \right) - \log \left( \sum_{j=1}^C \exp \hat{\mathbf{x}}_n^T \left( \frac{\mathbf{D}^{-\frac{1}{2}} \mathbf{U}^T \mathbf{s}_j}{\|\mathbf{D}^{-\frac{1}{2}} \mathbf{U}^T \mathbf{s}_j\|} \right) \right) \right) \quad (4)$$

$$\mathbf{z}_c = \mathbf{D}^{-\frac{1}{2}} \mathbf{U}^T \mathbf{s}_c \quad (5)$$

$$L_{LACE} = \frac{-1}{B} \sum_{n=1}^B \left( \hat{\mathbf{x}}_n^T \left( \frac{\mathbf{z}_c}{\|\mathbf{z}_c\|} \right) - \log \left( \sum_{j=1}^C \exp \hat{\mathbf{x}}_n^T \left( \frac{\mathbf{z}_j}{\|\mathbf{z}_j\|} \right) \right) \right) \quad (6)$$

$$\mathbf{z}'_c = \frac{\partial}{\partial \mathbf{s}_c} \left( \frac{\mathbf{z}_c}{\|\mathbf{z}_c\|} \right) = \frac{\partial}{\partial \mathbf{s}_c} \left( \frac{\mathbf{D}^{-\frac{1}{2}} \mathbf{U}^T \mathbf{s}_c}{\|\mathbf{D}^{-\frac{1}{2}} \mathbf{U}^T \mathbf{s}_c\|} \right) = \left( \frac{\|\mathbf{z}_c\| (\mathbf{D}^{-\frac{1}{2}} \mathbf{U}^T) - \frac{\mathbf{z}_c (\mathbf{U} \mathbf{D}^{-1} \mathbf{U}^T \mathbf{s}_c)^T}{\|\mathbf{z}_c\|}}{\|\mathbf{z}_c\|^2} \right) \quad (7)$$

$$\frac{\partial L_{LACE}}{\partial \mathbf{s}_c} = \frac{-1}{B} \sum_{n=1}^B \frac{\partial}{\partial \mathbf{s}_c} \left( \hat{\mathbf{x}}_n^T \left( \frac{\mathbf{z}_c}{\|\mathbf{z}_c\|} \right) - \log \left( \sum_{j=1}^C \exp \hat{\mathbf{x}}_n^T \left( \frac{\mathbf{z}_j}{\|\mathbf{z}_j\|} \right) \right) \right) \quad (8)$$

$$\frac{\partial L_{LACE}}{\partial \mathbf{s}_c} = \frac{-1}{B} \sum_{n=1}^B \left( \hat{\mathbf{x}}_n^T \mathbf{z}'_c - \frac{\exp \hat{\mathbf{x}}_n^T \left( \frac{\mathbf{z}_c}{\|\mathbf{z}_c\|} \right) \hat{\mathbf{x}}_n^T \mathbf{z}'_c}{\sum_{j=1}^C \exp \hat{\mathbf{x}}_n^T \left( \frac{\mathbf{z}_j}{\|\mathbf{z}_j\|} \right)} \right) \quad (9)$$

## B. Background Mean

$$L_{LACE} = \frac{1}{B} \sum_{n=1}^B -\log \left( \frac{\exp \hat{\mathbf{s}}_c^T \hat{\mathbf{x}}_n}{\sum_{j=1}^C \exp \hat{\mathbf{s}}_j^T \hat{\mathbf{x}}_n} \right) \quad (1)$$

$$L_{LACE} = \frac{-1}{B} \sum_{n=1}^B \left( \hat{\mathbf{s}}_c^T \hat{\mathbf{x}}_n - \log \left( \sum_{j=1}^C \exp \hat{\mathbf{s}}_j^T \hat{\mathbf{x}}_n \right) \right) \quad (2)$$

$$L_{LACE} = \frac{-1}{B} \sum_{n=1}^B \left( \hat{\mathbf{s}}_c^T \left( \frac{\mathbf{D}^{-\frac{1}{2}} \mathbf{U}^T (\mathbf{x}_n - \boldsymbol{\mu}_b)}{\|\mathbf{D}^{-\frac{1}{2}} \mathbf{U}^T (\mathbf{x}_n - \boldsymbol{\mu}_b)\|} \right) - \log \left( \sum_{j=1}^C \exp \hat{\mathbf{s}}_j^T \left( \frac{\mathbf{D}^{-\frac{1}{2}} \mathbf{U}^T (\mathbf{x}_n - \boldsymbol{\mu}_b)}{\|\mathbf{D}^{-\frac{1}{2}} \mathbf{U}^T (\mathbf{x}_n - \boldsymbol{\mu}_b)\|} \right) \right) \right) \quad (3)$$

$$\mathbf{m}_b = \mathbf{D}^{-\frac{1}{2}} \mathbf{U}^T (\mathbf{x}_n - \boldsymbol{\mu}_b) \quad (4)$$

$$L_{LACE} = \frac{-1}{B} \sum_{n=1}^B \left( \hat{\mathbf{s}}_c^T \left( \frac{\mathbf{m}_b}{\|\mathbf{m}_b\|} \right) - \log \left( \sum_{j=1}^C \exp \hat{\mathbf{s}}_j^T \left( \frac{\mathbf{m}_b}{\|\mathbf{m}_b\|} \right) \right) \right) \quad (5)$$

$$\frac{\partial L_{LACE}}{\partial \boldsymbol{\mu}_b} = \frac{-1}{B} \sum_{n=1}^B \frac{\partial}{\partial \boldsymbol{\mu}_b} \left( \hat{\mathbf{s}}_c^T \left( \frac{\mathbf{m}_b}{\|\mathbf{m}_b\|} \right) - \log \left( \sum_{j=1}^C \exp \hat{\mathbf{s}}_j^T \left( \frac{\mathbf{m}_b}{\|\mathbf{m}_b\|} \right) \right) \right) \quad (6)$$

$$\mathbf{m}'_b = \frac{\partial}{\partial \boldsymbol{\mu}_b} \left( \frac{\mathbf{m}_b}{\|\mathbf{m}_b\|} \right) = \frac{\partial}{\partial \boldsymbol{\mu}_b} \left( \frac{\mathbf{D}^{-\frac{1}{2}} \mathbf{U}^T (\mathbf{x}_n - \boldsymbol{\mu}_b)}{\|\mathbf{D}^{-\frac{1}{2}} \mathbf{U}^T (\mathbf{x}_n - \boldsymbol{\mu}_b)\|} \right) = \frac{-\|\mathbf{m}_b\| \mathbf{D}^{-\frac{1}{2}} \mathbf{U}^T - \frac{\mathbf{m}_b (\mathbf{x}_n^T \boldsymbol{\Sigma}_b^{-1} + \boldsymbol{\Sigma}_b^{-1} \boldsymbol{\mu}_b)}{\|\mathbf{m}_b\|}}{\|\mathbf{m}_b\|^2} \quad (7)$$

$$\frac{\partial L_{LACE}}{\partial \boldsymbol{\mu}_b} = \frac{-1}{B} \sum_{n=1}^B \left( \hat{\mathbf{s}}_c^T \mathbf{m}'_b - \frac{\sum_{j=1}^C \exp \hat{\mathbf{s}}_j^T \left( \frac{\mathbf{m}_b}{\|\mathbf{m}_b\|} \right) \hat{\mathbf{s}}_j^T \mathbf{m}'_b}{\sum_{j=1}^C \exp \hat{\mathbf{s}}_j^T \left( \frac{\mathbf{m}_b}{\|\mathbf{m}_b\|} \right)} \right) \quad (8)$$

$$\frac{\partial L_{LACE}}{\partial \boldsymbol{\mu}_b} = \frac{-1}{B} \sum_{n=1}^B \left( \hat{\mathbf{s}}_c^T \mathbf{m}'_b - \sum_{j=1}^C \hat{\mathbf{s}}_j^T \mathbf{m}'_b \right) \quad (9)$$

$$\frac{\partial L_{LACE}}{\partial \boldsymbol{\mu}_b} = \frac{1}{B} \sum_{n=1}^B \sum_{\substack{j=1 \\ j \neq c}}^C \hat{\mathbf{s}}_j^T \mathbf{m}'_b \quad (10)$$

$$\frac{\partial L_{LACE}}{\partial \boldsymbol{\mu}_b} = \frac{1}{B} \sum_{n=1}^B \sum_{\substack{j=1 \\ j \neq c}}^C \hat{\mathbf{s}}_j^T \mathbf{D}^{-\frac{1}{2}} \mathbf{U}^T (\mathbf{x}_n - \boldsymbol{\mu}_b) \quad (11)$$

## C. Inverse Background Covariance

*Note:* In the code, we do not compute the inverse. Instead, by enforcing this metric, we expect the algorithm to learn a matrix that is the inverse background covariance. We take the derivative here with respect to  $\boldsymbol{\Sigma}_b^{-1}$ .

$$L_{LACE} = \frac{1}{B} \sum_{n=1}^B -\log \left( \frac{\exp \hat{\mathbf{s}}_c^T \hat{\mathbf{x}}_n}{\sum_{j=1}^C \exp \hat{\mathbf{s}}_j^T \hat{\mathbf{x}}_n} \right) \quad (1)$$

$$L_{LACE} = \frac{-1}{B} \sum_{n=1}^B \left( \hat{\mathbf{s}}_c^T \hat{\mathbf{x}}_n - \log \left( \sum_{j=1}^C \exp \hat{\mathbf{s}}_j^T \hat{\mathbf{x}}_n \right) \right) \quad (2)$$

$$\hat{\mathbf{s}}_c^T \hat{\mathbf{x}}_n = \frac{\mathbf{s}_c^T \Sigma_b^{-1} (\mathbf{x}_n - \boldsymbol{\mu}_b)}{\|\mathbf{s}_c^T \Sigma_b^{-1} (\mathbf{x}_n - \boldsymbol{\mu}_b)\|} \quad (3)$$

$$L_{LLACE} = \frac{-1}{B} \sum_{n=1}^B \left( \frac{\mathbf{s}_c^T \Sigma_b^{-1} (\mathbf{x}_n - \boldsymbol{\mu}_b)}{\|\mathbf{s}_c^T \Sigma_b^{-1} (\mathbf{x}_n - \boldsymbol{\mu}_b)\|} - \log \left( \sum_{j=1}^C \exp \frac{\mathbf{s}_j^T \Sigma_b^{-1} (\mathbf{x}_n - \boldsymbol{\mu}_b)}{\|\mathbf{s}_j^T \Sigma_b^{-1} (\mathbf{x}_n - \boldsymbol{\mu}_b)\|} \right) \right) \quad (4)$$

$$\mathcal{V}'_c = \frac{\partial}{\partial \Sigma_b^{-1}} \|\mathbf{s}_c^T \Sigma_b^{-1} (\mathbf{x}_n - \boldsymbol{\mu}_b)\| = \frac{\mathbf{s}_c \mathbf{s}_c^T (\mathbf{x}_n - \boldsymbol{\mu}_b)^T \Sigma_b^{-1} (\mathbf{x}_n - \boldsymbol{\mu}_b) + \mathbf{s}_c^T \Sigma_b^{-1} \mathbf{s}_c (\mathbf{x}_n - \boldsymbol{\mu}_b) (\mathbf{x}_n - \boldsymbol{\mu}_b)^T}{2 \|\mathbf{s}_c^T \Sigma_b^{-1} (\mathbf{x}_n - \boldsymbol{\mu}_b)\|} \quad (5)$$

$$V'_c = \frac{\partial}{\partial \Sigma_b^{-1}} \left( \frac{\mathbf{s}_c^T \Sigma_b^{-1} (\mathbf{x}_n - \boldsymbol{\mu}_b)}{\|\mathbf{s}_c^T \Sigma_b^{-1} (\mathbf{x}_n - \boldsymbol{\mu}_b)\|} \right) = \left( \frac{\|\mathbf{s}_c^T \Sigma_b^{-1} (\mathbf{x}_n - \boldsymbol{\mu}_b)\| (\mathbf{x}_n - \boldsymbol{\mu}_b) \mathbf{s}_c^T - \mathbf{s}_c^T \Sigma_b^{-1} (\mathbf{x}_n - \boldsymbol{\mu}_b) \mathcal{V}'_c}{\|\mathbf{s}_c^T \Sigma_b^{-1} (\mathbf{x}_n - \boldsymbol{\mu}_b)\|^2} \right) \quad (6)$$

$$\frac{\partial L_{LLACE}}{\partial \Sigma_b^{-1}} = \frac{-1}{B} \sum_{n=1}^B \frac{\partial}{\partial \Sigma_b^{-1}} \left( \frac{\mathbf{s}_c^T \Sigma_b^{-1} (\mathbf{x}_n - \boldsymbol{\mu}_b)}{\|\mathbf{s}_c^T \Sigma_b^{-1} (\mathbf{x}_n - \boldsymbol{\mu}_b)\|} - \log \left( \sum_{j=1}^C \exp \frac{\mathbf{s}_j^T \Sigma_b^{-1} (\mathbf{x}_n - \boldsymbol{\mu}_b)}{\|\mathbf{s}_j^T \Sigma_b^{-1} (\mathbf{x}_n - \boldsymbol{\mu}_b)\|} \right) \right) \quad (7)$$

$$\frac{\partial L_{LLACE}}{\partial \Sigma_b^{-1}} = \frac{-1}{B} \sum_{n=1}^B \left( V'_c - \frac{\sum_{j=1}^C \exp \frac{\mathbf{s}_j^T \Sigma_b^{-1} (\mathbf{x}_n - \boldsymbol{\mu}_b)}{\|\mathbf{s}_j^T \Sigma_b^{-1} (\mathbf{x}_n - \boldsymbol{\mu}_b)\|}}{\sum_{j=1}^C \exp \frac{\mathbf{s}_j^T \Sigma_b^{-1} (\mathbf{x}_n - \boldsymbol{\mu}_b)}{\|\mathbf{s}_j^T \Sigma_b^{-1} (\mathbf{x}_n - \boldsymbol{\mu}_b)\|}} V'_j \right) \quad (8)$$

$$\frac{\partial L_{LLACE}}{\partial \Sigma_b^{-1}} = \frac{-1}{B} \sum_{n=1}^B \left( V'_c - \sum_{j=1}^C V'_j \right) \quad (9)$$

$$\frac{\partial L_{LLACE}}{\partial \Sigma_b^{-1}} = \frac{1}{B} \sum_{n=1}^B \sum_{\substack{j=1 \\ j \neq c}}^C V'_j \quad (10)$$

$$\frac{\partial L_{LLACE}}{\partial \Sigma_b^{-1}} = \frac{1}{B} \sum_{n=1}^B \sum_{\substack{j=1 \\ j \neq c}}^C \left( \frac{\|\mathbf{s}_j^T \Sigma_b^{-1} (\mathbf{x}_n - \boldsymbol{\mu}_b)\| (\mathbf{x}_n - \boldsymbol{\mu}_b) \mathbf{s}_j^T - \mathbf{s}_j^T \Sigma_b^{-1} (\mathbf{x}_n - \boldsymbol{\mu}_b) \mathcal{V}'_j}{\|\mathbf{s}_j^T \Sigma_b^{-1} (\mathbf{x}_n - \boldsymbol{\mu}_b)\|^2} \right) \quad (11)$$
